# Supplementary material for: Biomimetic synthesis of Ag-coated glasswing butterfly arrays as ultra-sensitive SERS substrates for efficient trace detection of pesticides
Source: publisher site journal article supplement (doi:10.3762/bjnano.10.59), 2019-02-28
Supplement: Additional file 1 [file 2190-4286-10-59-S1.pdf]

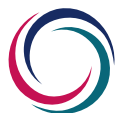

## Supporting Information

for

### **Biomimetic synthesis of Ag-coated glasswing butterfly arrays as ultra-sensitive SERS substrates for efficient trace detection of pesticides**

Guochao Shi, Mingli Wang, Yanying Zhu, Yuhong Wang, Xiaoya Yan, Xin Sun, Haijun Xu and Wanli Ma

*Beilstein J. Nanotechnol.* **2019**, *10*, 578–588. [doi:10.3762/bjnano.10.59](https://doi.org/10.3762/bjnano.10.59)

## **Additional theoretical and experimental information**

1 Enhancement factor (EF) calculation.

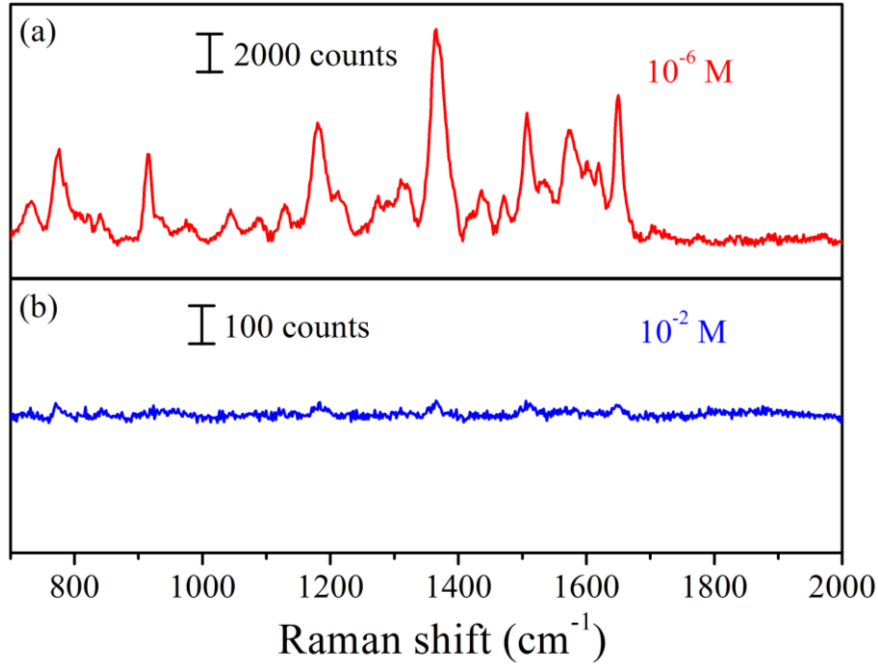

**Figure S1:** (a) SERS spectrum of 10<sup>-6</sup> M CV solution acquired from Ag-Gb.-20 substrate. (b) Normal Raman spectrum of 10<sup>-2</sup> M CV solution.

2 The calculated EF was by the following equation(1) [1]:

$$G_{SERS} = \left| \frac{E_{loc}(\omega)}{E_{inc}(\omega)} \right|^4 \quad (1)$$

where the  $E_{loc}(\omega)$  and  $E_{inc}(\omega)$  represent to the  $E$  and  $E_0$  in the 3D-FDTD simulation, respectively.

3 The RSD value was calculated according to the following equation (2) [2]:

$$RSD = \frac{\sqrt{\frac{\sum_{i=1}^n (I_i - \bar{I})^2}{n-1}}}{\bar{I}} \quad (2)$$

where the  $\bar{I}$  represents the average intensity of the Raman signal,  $n$  is the number of the measured spectrum,  $I_i$  is the Raman intensity of each spectrum at a characteristic peak.

#### 4 Point-by-point reproducibility of Ag-G.b.-20 substrate.

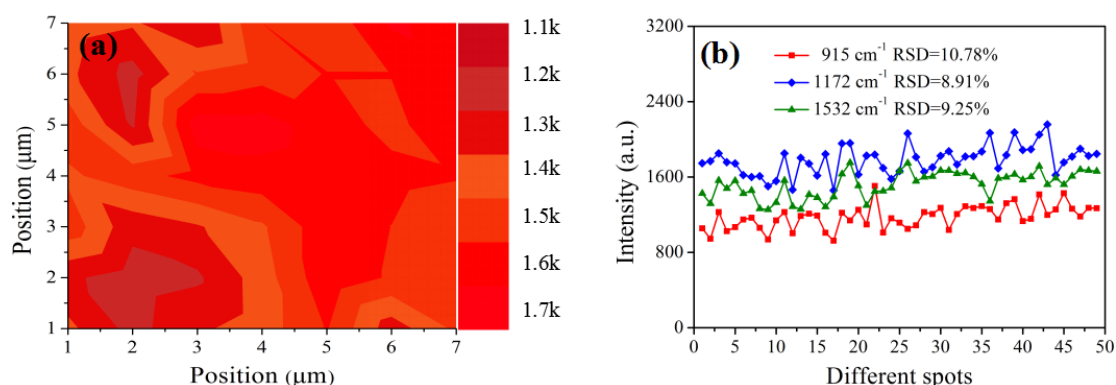

**Figure S2:** (a) Raman mapping of the 1532  $\text{cm}^{-1}$  peak. (b) The RSD of Raman intensities of 915, 1172 and 1532  $\text{cm}^{-1}$  ( $C_{CV}=10^{-7}$  M) for an area of  $7 \mu\text{m} \times 7 \mu\text{m}$  on a Ag-G.b.-20 substrate.

#### 5 The concentration converted from mg-to-ml to mass-to-area ratio:

In our experiment, the detection of  $10^{-10}$  mg/ml acephate was based on 10  $\mu\text{L}$  acephate ethanol solution adsorbed on the Ag-G.b.-20 substrate with a cover area of approximately  $0.5 \text{ cm}^2$ . By unit conversion,  $10^{-10}$  mg/ml was approximately equaled to  $2 \times 10^{-6} \text{ ng cm}^{-2}$ . Meanwhile, the concentration converted from mass-to-area ratio to mg per kilogram was roughly calculated according to the reported work [3].

**Table S1:** Linear relationships between acephate concentrations ( $10^{-5} \text{ mg mL}^{-1}$ - $10^{-10} \text{ mg mL}^{-1}$ ) and Raman intensities at characteristic peaks of acephate.

| Peak/ $\text{cm}^{-1}$ | Linear function  | $R^2$ |
|------------------------|------------------|-------|
| 1078                   | $y=0.179x+6.155$ | 0.986 |
| 1185                   | $y=0.170x+5.990$ | 0.966 |
| 1576                   | $y=0.170x+6.851$ | 0.961 |

6 RSD values of 1185 and 1576  $\text{cm}^{-1}$  of acephate.

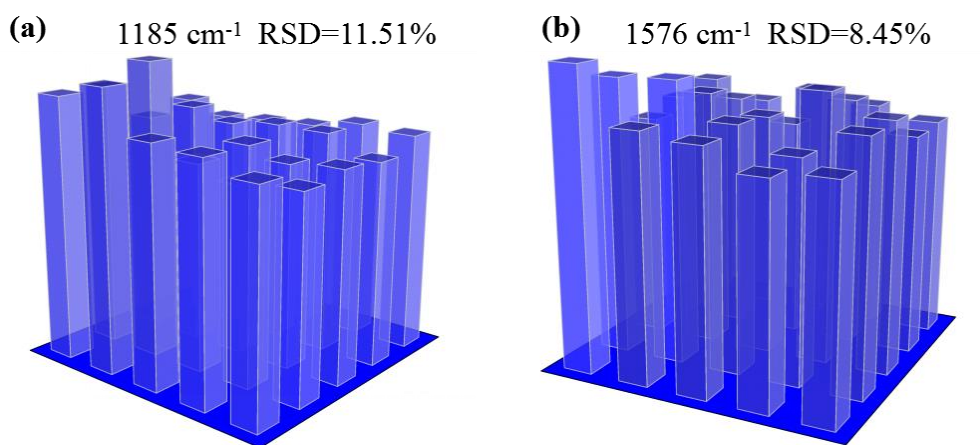

**Figure S3:** The corresponding intensity distributions at 1185 and 1576  $\text{cm}^{-1}$  of  $10^{-8}$  mg/ml acephate molecules from 25 Raman spectra.

### References

1. García-Vidal, F. J.; Pendry, J. B. *Phys. Rev. Lett.* **1996**, 77, 1163-1166.
2. Parsons, H. M.; Ekman, D. R.; Collette, T. W.; Viant, M. R. *Analyst* **2009**, 134, 478-485.
3. Liu, B. H.; Han, G. M.; Zhang, Z. P.; Liu, R. Y.; Jiang, C. L.; Wang, S. H.; Han, M. *Y. Anal. Chem.* **2012**, 84, 255-261.
